# Supplementary material for: Towards the preparation of binderless ZSM-5 zeolite catalysts: the crucial role of silanol nests
Source: Royal Society of Chemistry journal article supplement (doi:10.1039/d0cy01289k), 2020-01-01
Supplement: d0cy01289k1.pdf [file d0cy01289k1.pdf]

# **Towards the Preparation of Binderless ZSM-5 Zeolite Catalyst: The Crucial Role of Silanol Nest**

Zaichao Li<sup>a,1</sup>, Xiao Jiang<sup>b,1</sup>, Guang Xiong<sup>a</sup>, Binjian Nie<sup>c</sup>, Chunyan Liu<sup>a</sup>, Ning He<sup>a</sup>, Jiaxu Liu<sup>a\*</sup>

*<sup>a</sup> State Key Laboratory of Fine Chemicals & Department of Catalytic Chemistry and  
Engineering, Dalian University of Technology, Dalian, 116024, China*

*<sup>b</sup> Chemical Sciences Division, Oak Ridge National Laboratory, Oak Ridge, TN 37831 USA*

*<sup>c</sup> Birmingham Centre for Energy Storage & School of Chemical Engineering, University of  
Birmingham, Edgbaston, Birmingham, UK, B15 2TT*

## **Corresponding author**

Dr. Jiaxu Liu

E-mail: liujiaxu@dlut.edu.cn

Tel.& Fax: +86-411-8498-6162

Supporting information:

**Table S1 Influence of different concentration of TPAOH on physical properties of the defective ZSM-5 zeolites**

| Sample <sup>a</sup> | C <sub>TPAOH</sub><br>(%) | Temperature<br>(°C) | V <sub>tol</sub> <sup>b</sup><br>(cm <sup>3</sup> g <sup>-1</sup> ) | V <sub>micro</sub> <sup>c</sup><br>(cm <sup>3</sup> g <sup>-1</sup> ) | S <sub>BET</sub> <sup>d</sup><br>(m <sup>2</sup> g <sup>-1</sup> ) | S <sub>micro</sub> <sup>c</sup><br>(m <sup>2</sup> g <sup>-1</sup> ) | S <sub>meso</sub> <sup>c</sup><br>(m <sup>2</sup> g <sup>-1</sup> ) |
|---------------------|---------------------------|---------------------|---------------------------------------------------------------------|-----------------------------------------------------------------------|--------------------------------------------------------------------|----------------------------------------------------------------------|---------------------------------------------------------------------|
| P-D                 | —                         | —                   | 0.22                                                                | 0.11                                                                  | 386                                                                | 261                                                                  | 125                                                                 |
| E-D                 | —                         | —                   | 0.26                                                                | 0.09                                                                  | 357                                                                | 207                                                                  | 150                                                                 |
| E-D-T24             | 0.2                       | 170                 | 0.23                                                                | 0.09                                                                  | 327                                                                | 197                                                                  | 130                                                                 |
| E-D-T24             | 0.6                       | 170                 | 0.19                                                                | 0.09                                                                  | 349                                                                | 216                                                                  | 133                                                                 |
| E-D-T24             | 1.2                       | 170                 | 0.21                                                                | 0.09                                                                  | 380                                                                | 216                                                                  | 164                                                                 |
| E-D-T24             | 2.1                       | 170                 | 0.21                                                                | 0.10                                                                  | 400                                                                | 236                                                                  | 164                                                                 |
| E-D-T24             | 2.5                       | 170                 | 0.22                                                                | 0.10                                                                  | 403                                                                | 228                                                                  | 175                                                                 |

**Table S2 Influence of different alkali treatment temperature on physical properties of the defective ZSM-5 zeolites**

| Sample <sup>a</sup> | C <sub>TPAOH</sub><br>(%) | Temperature<br>(°C) | V <sub>tol</sub> <sup>b</sup><br>(cm <sup>3</sup> g <sup>-1</sup> ) | V <sub>micro</sub> <sup>c</sup><br>(cm <sup>3</sup> g <sup>-1</sup> ) | S <sub>BET</sub> <sup>d</sup><br>(m <sup>2</sup> g <sup>-1</sup> ) | S <sub>micro</sub> <sup>c</sup><br>(m <sup>2</sup> g <sup>-1</sup> ) | S <sub>meso</sub> <sup>c</sup><br>(m <sup>2</sup> g <sup>-1</sup> ) |
|---------------------|---------------------------|---------------------|---------------------------------------------------------------------|-----------------------------------------------------------------------|--------------------------------------------------------------------|----------------------------------------------------------------------|---------------------------------------------------------------------|
| P-D                 | —                         | —                   | 0.22                                                                | 0.11                                                                  | 386                                                                | 261                                                                  | 125                                                                 |
| E-D                 | —                         | —                   | 0.26                                                                | 0.09                                                                  | 357                                                                | 207                                                                  | 150                                                                 |
| E-D-T24             | 2.1                       | 150                 | 0.24                                                                | 0.10                                                                  | 400                                                                | 230                                                                  | 170                                                                 |
| E-D-T24             | 2.1                       | 170                 | 0.21                                                                | 0.10                                                                  | 400                                                                | 236                                                                  | 164                                                                 |
| E-D-T24             | 2.1                       | 200                 | 0.24                                                                | 0.10                                                                  | 403                                                                | 226                                                                  | 177                                                                 |

**Table S3 Influence of different alkali treatment time on physical properties of the defective ZSM-5 zeolites**

| Sample <sup>a</sup> | C <sub>TPAOH</sub><br>(%) | Temperature<br>(°C) | V <sub>tol</sub> <sup>b</sup><br>(cm <sup>3</sup> g <sup>-1</sup> ) | V <sub>micro</sub> <sup>c</sup><br>(cm <sup>3</sup> g <sup>-1</sup> ) | S <sub>BET</sub> <sup>d</sup><br>(m <sup>2</sup> g <sup>-1</sup> ) | S <sub>micro</sub> <sup>c</sup><br>(m <sup>2</sup> g <sup>-1</sup> ) | S <sub>meso</sub> <sup>c</sup><br>(m <sup>2</sup> g <sup>-1</sup> ) |
|---------------------|---------------------------|---------------------|---------------------------------------------------------------------|-----------------------------------------------------------------------|--------------------------------------------------------------------|----------------------------------------------------------------------|---------------------------------------------------------------------|
| P-D                 | —                         | —                   | 0.22                                                                | 0.11                                                                  | 386                                                                | 261                                                                  | 125                                                                 |
| E-D                 | —                         | —                   | 0.26                                                                | 0.09                                                                  | 357                                                                | 207                                                                  | 150                                                                 |
| E-D-T22             | 2.1                       | 200                 | 0.23                                                                | 0.10                                                                  | 396                                                                | 223                                                                  | 173                                                                 |
| E-D-T24             | 2.1                       | 200                 | 0.24                                                                | 0.10                                                                  | 403                                                                | 226                                                                  | 177                                                                 |
| E-D-T26             | 2.1                       | 200                 | 0.23                                                                | 0.10                                                                  | 395                                                                | 221                                                                  | 174                                                                 |
| E-D-T28             | 2.1                       | 200                 | 0.25                                                                | 0.10                                                                  | 400                                                                | 223                                                                  | 177                                                                 |
| E-D-T30             | 2.1                       | 200                 | 0.25                                                                | 0.10                                                                  | 403                                                                | 225                                                                  | 178                                                                 |

<sup>a</sup>Sample codes: E-D-TXX (TXX-TPAOH treat time)

<sup>b</sup>V<sub>total</sub> was determined from the amount of N<sub>2</sub> adsorbed at  $p/p_0 = 0.99$

<sup>c</sup>t-plot method applied to the N<sub>2</sub> isotherm

<sup>d</sup>BET method applied to the N<sub>2</sub> isotherm

**Table S4 SiO<sub>2</sub>/Al<sub>2</sub>O<sub>3</sub> molar ratio of the different commercial ZSM-5 zeolites**

| Sample <sup>a</sup> | SiO <sub>2</sub> /Al <sub>2</sub> O <sub>3</sub> |
|---------------------|--------------------------------------------------|
| P-C                 | 24                                               |
| E-C                 | 31                                               |
| E-C-2.1%T           | 30                                               |
| E-C-2.1%T-Al        | 30                                               |

<sup>a</sup> Determined by XRF

**Table S5** roperties of the different defective ZSM-5 zeolites.

| Samples      | Particle Size<br>(nm) | Acidic by strength (mmol/g) <sup>a</sup> |               |               |       |
|--------------|-----------------------|------------------------------------------|---------------|---------------|-------|
|              |                       | Weak/Total                               | Medium/Total  | Strong/Total  | Total |
| P-D          | 211                   | 0.056 (42.9%)                            | 0.030 (22.9%) | 0.044 (34.2%) | 0.130 |
| P-D-T        | —                     | 0.030 (32.2%)                            | 0.032 (33.9%) | 0.032 (33.9%) | 0.094 |
| P-D-T-E      | —                     | 0.028 (48.7%)                            | 0.017 (30.4%) | 0.012 (24.4%) | 0.057 |
| E-D          | 209                   | 0.047 (51.0%)                            | 0.022 (24.5%) | 0.022 (24.5%) | 0.091 |
| E-D-2.1%T    | 168                   | 0.042 (45.6%)                            | 0.023 (24.4%) | 0.028 (30.0%) | 0.093 |
| E-D-2.1%T-Al | 205                   | 0.058 (45.1%)                            | 0.031 (23.7%) | 0.039 (31.2%) | 0.128 |

<sup>a</sup> Density of the acid sites, assorted according to the acid strength, determined by NH<sub>3</sub>-TPD.

Weak: NH<sub>3</sub> desorbed at 120-250°C;

Medium: NH<sub>3</sub> desorbed at 250-350°C;

Strong: NH<sub>3</sub> desorbed at 350-550°C.

**Table S6** physical and chemistry properties of the different defective ZSM-5 zeolites

| Sample                                              | P-D-T | E-D-2.1%T-Al |
|-----------------------------------------------------|-------|--------------|
| $V_{\text{tol}}$ (cm <sup>3</sup> g <sup>-1</sup> ) | 0.25  | 0.23         |
| $S_{\text{BET}}$ (m <sup>2</sup> g <sup>-1</sup> )  | 396   | 407          |
| Relative crystallinity (%)                          | 99%   | 100%         |
| n-hexane conversion -650°C (%)                      | 85.9% | 62.5%        |
| $S_{\text{Ethylene+Propylene}}$ -650°C (%)          | 54.6% | 49.6%        |

**Table S7** SiO<sub>2</sub>/Al<sub>2</sub>O<sub>3</sub> molar ratio of the different defective ZSM-5 zeolites

| Samples      | SiO <sub>2</sub> /Al <sub>2</sub> O <sub>3</sub> |                      |
|--------------|--------------------------------------------------|----------------------|
|              | Bulk <sup>a</sup>                                | Surface <sup>b</sup> |
| P-D          | 107                                              | 78                   |
| E-D          | 136                                              | 101                  |
| E-D-2.1%T    | 137                                              | 102                  |
| E-D-2.1%T-Al | 102                                              | 65                   |

<sup>a</sup> Determined by XRF

<sup>b</sup> Determined by XPS

**Table S8 Al content in filtrate after alkaline treatment of defective ZSM-5 zeolites.**

| Sample <sup>a</sup> | Al content in filtrate (mg L <sup>-1</sup> ) |
|---------------------|----------------------------------------------|
| E-D-2.1%T           | 0.02                                         |
| E-D-2.1%T-Al        | 0.60                                         |

<sup>a</sup> Determined by ICP-OES

**Table S9 Physical properties of the defective ZSM-5 zeolites**

| Sample <sup>a</sup> | $V_{\text{tol}}^b$<br>(cm <sup>3</sup> g <sup>-1</sup> ) | $V_{\text{micro}}^c$<br>(cm <sup>3</sup> g <sup>-1</sup> ) | $S_{\text{BET}}^d$<br>(m <sup>2</sup> g <sup>-1</sup> ) | $S_{\text{micro}}^c$<br>(m <sup>2</sup> g <sup>-1</sup> ) | $S_{\text{meso}}^c$<br>(m <sup>2</sup> g <sup>-1</sup> ) |
|---------------------|----------------------------------------------------------|------------------------------------------------------------|---------------------------------------------------------|-----------------------------------------------------------|----------------------------------------------------------|
| E-D-T2              | 0.25                                                     | 0.13                                                       | 404                                                     | 300                                                       | 104                                                      |
| E-D-T6              | 0.25                                                     | 0.13                                                       | 402                                                     | 296                                                       | 106                                                      |
| E-D-T12             | 0.25                                                     | 0.12                                                       | 408                                                     | 289                                                       | 119                                                      |
| E-D-T18             | 0.24                                                     | 0.12                                                       | 415                                                     | 266                                                       | 149                                                      |
| E-D-T24             | 0.24                                                     | 0.10                                                       | 403                                                     | 226                                                       | 177                                                      |
| E-D-T30             | 0.25                                                     | 0.10                                                       | 403                                                     | 225                                                       | 178                                                      |

<sup>a</sup>Sample codes: E-D-TXX (TXX-TPAOH treat time)

<sup>b</sup>  $V_{\text{total}}$  was determined from the amount of N<sub>2</sub> adsorbed at  $p/p_0 = 0.99$

<sup>c</sup>  $t$ -plot method applied to the N<sub>2</sub> isotherm

<sup>d</sup> BET method applied to the N<sub>2</sub> isotherm

**Table S10 Conversion and products distribution of n-hexane catalytic cracking over different defective ZSM-5 zeolites<sup>a</sup>**

| Samples            | Conversion (%) | Selectivity (%) |                               |                               |                               |                               |                               |                                |                             |     |
|--------------------|----------------|-----------------|-------------------------------|-------------------------------|-------------------------------|-------------------------------|-------------------------------|--------------------------------|-----------------------------|-----|
|                    |                | CH <sub>4</sub> | C <sub>2</sub> H <sub>4</sub> | C <sub>2</sub> H <sub>6</sub> | C <sub>3</sub> H <sub>6</sub> | C <sub>3</sub> H <sub>8</sub> | C <sub>4</sub> H <sub>8</sub> | C <sub>4</sub> H <sub>10</sub> | C <sub>5</sub> <sup>+</sup> | BTX |
| P-D-500°C          | 24.5           | 0.9             | 6.6                           | 6.7                           | 25.3                          | 12.1                          | 17.7                          | 7.3                            | 15.4                        | 8.0 |
| P-D-550°C          | 44.7           | 2.0             | 10.9                          | 8.4                           | 25.5                          | 19.2                          | 6.4                           | 14.2                           | 8.0                         | 5.4 |
| P-D-600°C          | 63.9           | 2.4             | 14.1                          | 10.4                          | 34.5                          | 13.2                          | 4.1                           | 12.9                           | 5.1                         | 3.3 |
| P-D-650°C          | 85.1           | 3.4             | 19.8                          | 10.6                          | 34.7                          | 11.3                          | 3.9                           | 8.1                            | 3.3                         | 4.9 |
| E-D-500°C          | 8.9            | 1.1             | 5.7                           | 6.5                           | 30.2                          | 9.9                           | 4.0                           | 11.3                           | 26.1                        | 5.2 |
| E-D-550°C          | 16.3           | 1.9             | 8.6                           | 9.7                           | 35.0                          | 12.3                          | 1.1                           | 15.2                           | 11.9                        | 4.3 |
| E-D-600°C          | 30.1           | 2.8             | 11.7                          | 10.2                          | 32.7                          | 12.4                          | 4.1                           | 14.2                           | 7.2                         | 4.7 |
| E-D-650°C          | 48.2           | 4.3             | 16.2                          | 10.1                          | 31.3                          | 11.1                          | 3.7                           | 11.6                           | 6.0                         | 5.7 |
| E-D-2.1%T-500°C    | 9.3            | 1.4             | 7.1                           | 7.9                           | 38.0                          | 11.2                          | 3.0                           | 15.0                           | 14.3                        | 2.1 |
| E-D-2.1%T-550°C    | 18.9           | 2.1             | 9.1                           | 10.0                          | 34.9                          | 13.7                          | 4.3                           | 16.3                           | 7.6                         | 2.0 |
| E-D-2.1%T-600°C    | 36.9           | 2.9             | 12.2                          | 10.6                          | 33.6                          | 13.6                          | 4.1                           | 15.5                           | 5.2                         | 2.3 |
| E-D-2.1%T-650°C    | 55.2           | 4.5             | 17.4                          | 11.3                          | 31.6                          | 11.4                          | 4.4                           | 11.1                           | 3.8                         | 4.5 |
| E-D-2.1%T-Al-500°C | 11.2           | 1.2             | 6.7                           | 7.6                           | 36.4                          | 11.1                          | 2.9                           | 13.8                           | 16.1                        | 4.2 |
| E-D-2.1%T-Al-550°C | 22.0           | 1.8             | 8.7                           | 9.8                           | 34.8                          | 13.0                          | 4.1                           | 15.8                           | 8.3                         | 3.7 |
| E-D-2.1%T-Al-600°C | 40.2           | 2.7             | 12.2                          | 11.1                          | 34.1                          | 11.8                          | 4.9                           | 13.5                           | 5.3                         | 4.4 |
| E-D-2.1%T-Al-650°C | 62.5           | 4.0             | 16.4                          | 10.4                          | 33.2                          | 11.3                          | 3.9                           | 11.8                           | 4.4                         | 4.6 |

<sup>a</sup> Reaction conditions: T = 500°C, 550°C, 600 °C, and 650 °C, P = 101.33 kPa.

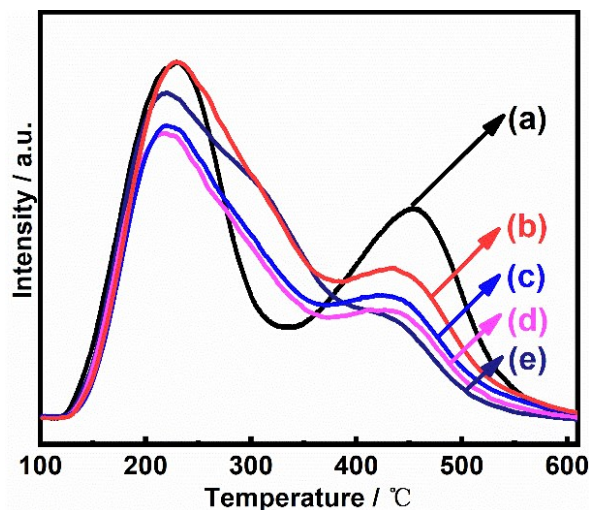

**Fig. S1**  $\text{NH}_3$ -TPD profiles of the effect over different types of aluminum source on the acidity of different defective ZSM-5 zeolites during alumination process.

(a) P-D (defective ZSM-5 zeolite powder), (b) E-D-2.1%T-Al ( $\text{E-D-2.1\%T} + 0.03 \text{ g Al}_2\text{O}_3$ ), (c) E-D-2.1%T-Al-1 ( $\text{E-D-2.1\%T} + 0.03 \text{ g C}_9\text{H}_{21}\text{AlO}_3$ ), (d) E-D-2.1%T-Al-2 ( $\text{E-D-2.1\%T} + 0.03 \text{ g Al}(\text{NO}_3)_3 \cdot 9\text{H}_2\text{O}$ ), (e) E-D-2.1%T-Al-3 ( $\text{E-D-2.1\%T} + 0.03 \text{ g NaAlO}_2$ ).

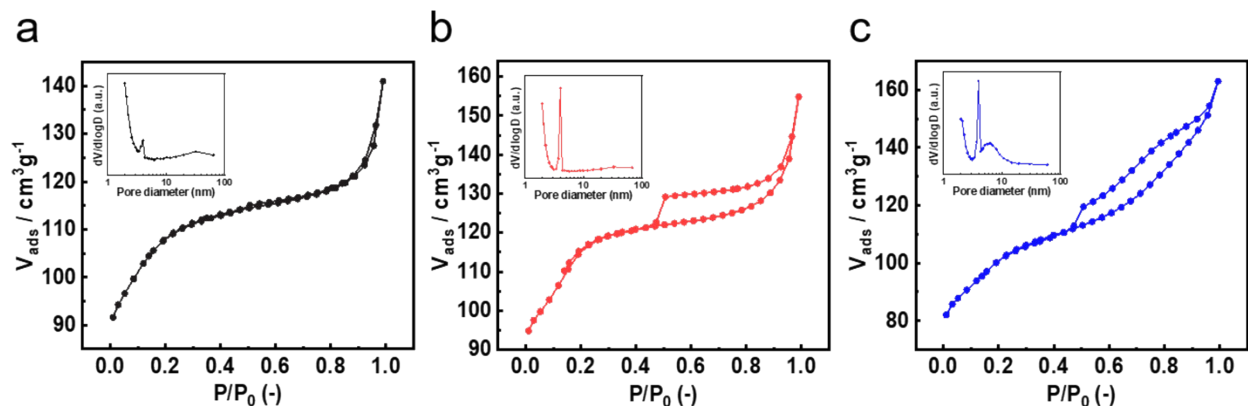

**Fig. S2**  $\text{N}_2$ -adsorption and desorption isotherms of the different defective ZSM-5 zeolites.

(a) P-D (defective ZSM-5 zeolite powder), (b) P-D-T (alkali treatment of P-D), (c) P-D-T-E (Extrudate: P-D-T + 20%  $\text{SiO}_2$  binder).

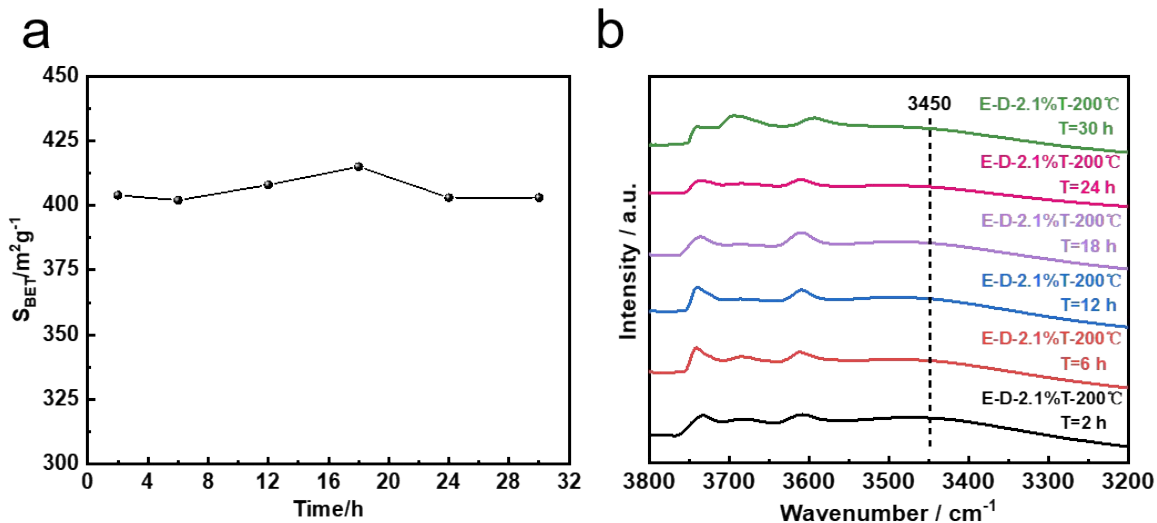

Fig. S3 (a) The time of TPAOH treatment versus the detailed changes of pore structure. (b) The time of TPAOH treatment versus the detailed changes of hydroxyl-nest and acidity.

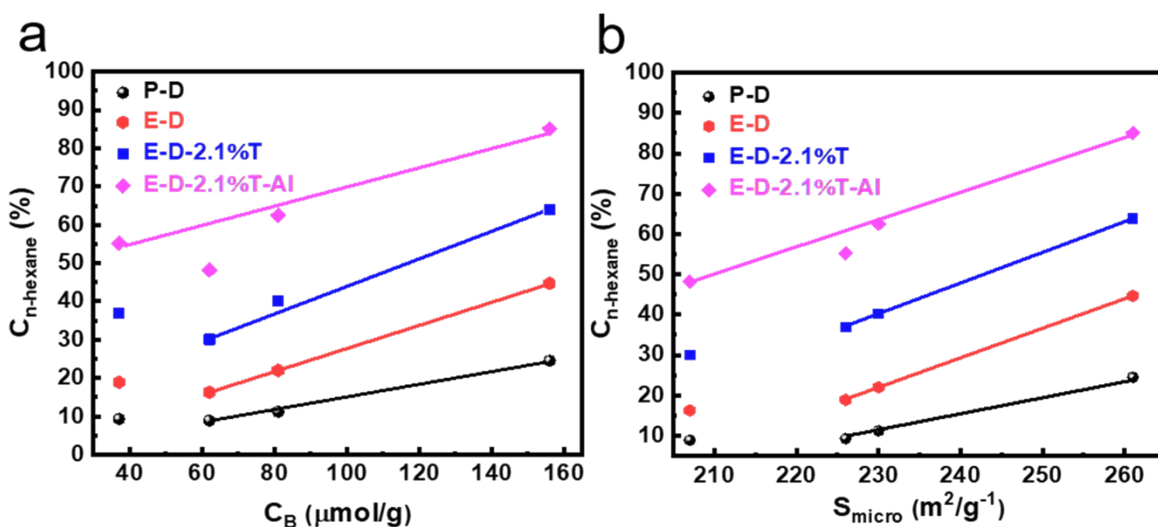

Fig. S4 Catalytic performance of the different defective ZSM-5 zeolites in the  $n$ -hexane catalytic cracking reaction.

P-D (defective ZSM-5 zeolite powder), E-D (Extrudate: P-D + 20%  $SiO_2$  binder), E-D-2.1T (2.1%TPAOH treatment of E-D), E-D-2.1T-Al (E-D-2.1T + 0.03 g  $Al_2O_3$ ).

(a) Conversion of  $n$ -hexane ( $C_{n-hexane}$ ) versus  $C_B$  derived from pyridine, (b) Conversion of  $n$ -hexane ( $C_{n-hexane}$ ) versus the micropore surface area.
